# Supplementary material for: DFT study of the rate constants of the reactions CHClmF3−m + Cl = CClmF3−m + HCl (m = 3 − 1)
Source: Royal Society of Chemistry journal article supplement (doi:10.1039/b206133n), 2002-01-01
Supplement: tables.doc [file tables.doc]

Table S1I. Calculated and reference frequencies (in cm-1) at the stationary points.

| Species | Frequencies |
| --- | --- |
| HCl | 3046  *2991*a  *2831*b |
| CHCl3 | 1. 1309 1309 802 802 695 384 277 277 2. *1216 1216 762 762 667 366 261 261*a   *3006 1232 1232 778 778 649 359 257 257*b |
| CHCl2F | 1. 1407 1329 1170 837 764 476 387 291 2. *1312 1241 1082 804 743 457 367 277*a   *2995 1322 1255 1117 806 719 443 360 271*b |
| CHClF2 | 1. 1452 1394 1218 1182 837 624 429 382   *3035 1350 1310 1088 805 794 595 415 369*a  *2992 1371 1320 1166 1118 794 576 400 355*b |
| CCl3 | 1. 933 509 332 289 289   *891 891 482 311 263 263*b |
| CCl2F | 1. 951 632 475 401 297   *1185 910 611 438 368 273*b |
| CClF2 | 1. 1229 799 620 440 381   *1251 1164 768 570 409 352*a |
| Cl3C-H-Cl | 1085 1085 862 862 761 447 287 287 236 92 92 1446*i*  *1024 1024 830 830 697 409 264 264 209 90 90 2149i*b |
| Cl2FC-H-Cl | 1. 1089 1039 895 827 524 399 302 246 118 96 1466*i*   *1177 1024 1024 869 760 484 370 280 223 98 85 2056i*b |
| ClF2C-H-Cl | 1. 1234 1020 1015 910 672 453 386 178 113 91 1332*i*   *1285 1206 1103 1048 897 649 437 376 287 102 92 1448i*b |

Italic numeral: a JANAF, Vol. 14, 1985, Suppl. 1. b Rayez, M-T.; Rayez, J-C. *J. Phys. Chem.* **1994**, 98, 11342.

Table S2. Potential barriers (D*E*b, in kcal mol-1) of three reactions at the BH&HLYP

level of theory.

|  | | 6-311G(d, p) | | | 6-311+G(3df, 2p) | | |
| --- | --- | --- | --- | --- | --- | --- | --- |
| *V*¹ | *V*aG¹ | Dr*H*298K0 | *V*¹ | *V*aG¹ | Dr*H*298K0 |
| CHCl3+Cl  CHCl2F+Cl  CHClF2+Cl | Forward  Forward  Forward | 8.62  9.92  12.07 | 4.27  5.80  7.89 | -5.71  -1.73  2.12 | 6.31  7.84  10.31 | 1.95  3.51  6.09 | -9.34  -4.99  -0.67 |

Table S3. Battleneck properties for three reactions.

| *T*(K) *s* (bohr) *V*MEP(kcal) *V*aG (kcal) | | | |
| --- | --- | --- | --- |
| *CHCl3 + Cl=CCl3 + HCl* | | | |
| S.P. | 0.000 | 6.31 | 15.03 |
| 200 | -0.313 | 5.59 | 16.56 |
| 400 | -0.269 | 5.61 | 16.30 |
| 600 | -0.253 | 5.61 | 16.12 |
| 800 | -0.245 | 5.60 | 16.00 |
| 1000 | -0.240 | 5.60 | 15.93 |
| *CHCl2F +Cl=CCl2F + HCl* | | | |
| S.P. | 0.000 | 8.18 | 17.90 |
| 200 | -0.011 | 8.18 | 17.92 |
| 400 | -0.013 | 8.18 | 17.91 |
| 600 | -0.016 | 8.17 | 17.91 |
| 800 | -0.026 | 8.04 | 17.80 |
| 1000 | -0.041 | 7.94 | 17.72 |
| *CHClF2 + Cl=CClF2 + HCl* | | | |
| S.P. | 0.000 | 10.32 | 21.03 |
| 200 | -0.070 | 10.33 | 21.18 |
| 400 | -0.063 | 10.34 | 21.18 |
| 600 | -0.060 | 10.35 | 21.18 |
| 800 | -0.058 | 10.35 | 21.17 |
| 1000 | -0.057 | 10.35 | 21.17 |

Table S4. Calculated and experimental forward rate constants (in cm3 molecule-1 s-1) for the three reactions.

| *T* (K) | TST | ICVT | ICVT/SCT | Ref 22 | Ref 17 | Ref 11 | Ref 10 |
| --- | --- | --- | --- | --- | --- | --- | --- |
| *CHCl3 + Cl=CCl3F + HCl* | | | | | | | |
| 200 | 1.12E-14 | 9.79E-16 | 1.30E-14 |  |  |  | 1.11E-14 |
| 250 | 3.97E-14 | 7.39E-15 | 2.97E-14 | 3.38E-14 |  |  | 4.16E-14 |
| 278 | 6.85E-14 | 1.69E-14 | 4.70E-14 | 5.90E-14 |  |  | 7.09E-14 |
| 298 | 9.63E-14 | 2.77E-14 | 6.43E-14 | 8.24E-14 | 1.42E-13 | 7.54E-14 | 9.75E-14 |
| 336 | 1.68E-13 | 6.08E-14 | 1.11E-13 | 1.39E-13 | 2.39E-13 | 1.28E-13 |  |
| 400 | 3.59E-13 | 1.59E-13 | 2.33E-13 | 2.70E-13 | 4.61E-13 | 2.48E-13 |  |
| 420 | 4.40E-13 | 2.06E-13 | 2.88E-13 | 3.18E-13 | 5.44E-13 | 2.92E-13 |  |
| 500 | 8.79E-13 | 4.77E-13 | 5.94E-13 | 5.39E-13 | 9.20E-13 |  |  |
| 550 | 1.26E-12 | 7.23E-13 | 8.62E-13 | 6.93E-13 | 1.18E-12 |  |  |
| 600 | 1.74E-12 | 1.03E-12 | 1.19E-12 |  | 1.46E-12 |  |  |
| 650 | 2.31E-12 | 1.41E-12 | 1.60E-12 |  | 1.74E-12 |  |  |
| *CHCl2F + Cl=CCl2F + HCl* | | | | | | | |
| 200 | 2.57E-16 | 1.31E-16 | 1.82E-15 |  |  |  | 1.23E-15 |
| 278 | 4.22E-15 | 2.75E-15 | 7.10E-15 |  |  |  | 1.30E-14 |
| 295 | 6.53E-15 | 4.39E-15 | 9.73E-15 |  |  |  | 1.84E-14 |
| 298 | 7.03E-15 | 4.74E-15 | 1.03E-14 |  |  | 1.88E-14 | 1.95E-14 |
| 400 | 4.80E-14 | 3.55E-14 | 5.09E-14 |  |  | 7.90E-14 |  |
| 420 | 6.40E-14 | 4.78E-14 | 6.58E-14 |  |  | 9.64E-14 |  |
| *CHClF2 + Cl=CClF2 + HCl* | | | | | | | |
| 200 | 8.93E-19 | 6.28E-19 | 2.72E-17 |  |  |  |  |
| 298 | 1.58E-16 | 1.27E-16 | 6.37E-16 |  |  | 1.52E-15 |  |
| 336 | 5.59E-16 | 4.62E-16 | 1.68E-15 |  |  | 3.83E-15 |  |
| 363 | 1.19E-15 | 9.97E-16 | 3.05E-15 |  |  | 6.56E-15 |  |
| 377 | 1.69E-15 | 1.43E-15 | 4.07E-15 |  |  | 8.41E-15 |  |
| 388 | 2.20E-15 | 1.87E-15 | 5.04E-15 |  |  | 1.01E-14 |  |
| 413 | 3.82E-15 | 3.28E-15 | 7.94E-15 |  |  | 1.48E-14 |  |
